# Supplementary material for: Pressurized N2 directly fed to the RuAu/CeO1.76 catalyst porous electrode in a proton exchange membrane electrolyzer favoring electrochemical NH3 production
Source: Royal Society of Chemistry journal article supplement (doi:10.1039/d2cc04488a), 2022-01-01
Supplement: d2cc04488a1.pdf [file d2cc04488a1.pdf]

## Pressurized N<sub>2</sub> directly fed to the RuAu/CeO<sub>1.76</sub> catalyst porous electrode in a proton exchange membrane electrolyzer favoring electrochemical NH<sub>3</sub> production

Lianqiao Tan,<sup>a</sup> Meng Wang,<sup>\*a</sup> Mingming Deng,<sup>a</sup> Cheng Tong,<sup>a</sup> Xin Feng,<sup>a</sup> Qiang Liao,<sup>b, c</sup> Zidong Wei<sup>\*a</sup>

<sup>a</sup> National-municipal Joint Engineering Laboratory for Chemical Process Intensification and Reaction, College of Chemistry and Chemical Engineering, Chongqing University, Chongqing, 400044, China

<sup>b</sup> Key Laboratory of Low-grade Energy Utilization Technologies and Systems, Ministry of Education, Chongqing 400030, China

<sup>c</sup> Institute of Engineering Thermophysics, School of Energy and Power Engineering, Chongqing University, Chongqing 400030, China

\*E-Mail: zdwei@cqu.edu.cn; wmeng@cqu.edu.cn

### Experimental Section

**Materials:** Cerium trichloride (CeCl<sub>3</sub>·7H<sub>2</sub>O, AR), Sodium hydroxide (NaOH, AR), salicylic acid, sodium hydroxide, sodium citrate, sodium hypochlorite (NaClO, AR), sodium nitroprusside (AR), para-(dimethylamino) benzaldehyde (p-C<sub>9</sub>H<sub>11</sub>NO, AR), hydrochloric acid (HCl, AR), ethanol (AR), sulfanilic acid (AR), N-(1-naphthyl)-ethylenediamine dihydrochloride (AR), and acetic acid (AR) were purchased from Chuandong Chemical Group Co., Ltd., Chloroauric acid (HAuCl<sub>4</sub>, AR), Ruthenium trichloride (RuCl<sub>3</sub>, AR), and (<sup>15</sup>NH<sub>4</sub>)<sub>2</sub>SO<sub>4</sub> (AR) were purchased from Aladdin Ltd. (Shanghai, China). Diluted water throughout all experiments was purified through a Millipore system.

## **Synthesis of CeO<sub>1.80</sub> and CeO<sub>1.88</sub> nanorods**

The CeO<sub>2</sub>·xH<sub>2</sub>O precursors were prepared through a typical hydrothermal method. Briefly, 1.48 g CeCl<sub>3</sub>·7H<sub>2</sub>O dissolved in 10 mL ultrapure H<sub>2</sub>O was mixed with 19.2 g NaOH in 70 mL water under vigorous stirring for 2 h. Then the suspension solution was transferred into Teflon-lined autoclave, and kept in 100 °C for 24 h. After natural cool, the CeO<sub>2</sub>·xH<sub>2</sub>O precursors were collected by centrifugation and washed by water and ethanol by three times, respectively, followed by vacuum-dried in 60.

For synthesis of CeO<sub>1.80</sub> nanorods, 300 mg of CeO<sub>2</sub>·xH<sub>2</sub>O precursors were redispersed into 150 mL diluted H<sub>2</sub>O under ultrasonic for 30 min, and then undergo a secondary hydrothermal treatment in 160 °C for 12 h. After cooling naturally, the CeO<sub>1.80</sub> nanorods were collected by centrifugation and washed by water and ethanol for three times, followed by vacuum-dried in 60 °C.

For synthesis of CeO<sub>2</sub> nanorods with deficient oxygen vacancies, the CeO<sub>2</sub>·xH<sub>2</sub>O powders were annealed at 700 °C for 4 h in muffle furnace. After cooling naturally, the obtained CeO<sub>1.88</sub> powders were mechanical ground and collected.

## **Synthesis of RuAu/CeO<sub>1.76</sub> and RuAu/CeO<sub>1.84</sub> hybrid catalysts**

95 mg CeO<sub>1.80</sub> powders were uniformly dispersed in 20 mL dilute water under ultrasonic, and stirred in ice-water bath. A 5 mL mixture solution containing 3.3 mM RuCl<sub>3</sub> and 3.3 mM HAuCl<sub>4</sub> was added dropwise into the CeO<sub>1.80</sub> suspension. After continuous stirring for 3 h, the mixture was flash-frozen in liquid nitrogen, followed by lyophilized for 48 hours. 100 mg of the obtained CeO<sub>1.80</sub> supported RuAu precursors were transferred into a hermetically container under argon atmosphere. The container then underwent microwave irradiation for 15 s in microwave ovens with output power of 1000 W. After cooling naturally, the obtained black RuAu/CeO<sub>1.76</sub> powders were washed by

ethanol and water for three times, and vacuum-dried in sequence. The RuAu/CeO<sub>1.84</sub> were obtained as with the above methods, except for using CeO<sub>1.88</sub> as support.

## **Characterization**

Transmission electron microscopy (TEM) images were detected on a FEI Tecnai G2 T20 microscope, and scanning transmission electron microscopy (STEM) measurements were conducted on a FEI Tecnai G2 F20 FEGTE microscope operated with electron acceleration energy of 200 kV. X-ray photoelectron spectra (XPS) analysis were performed on a Thermal ESCALAB 250 XI. The C 1s peak (284.8 eV) was employed as the reference standard. X-ray diffraction (XRD) data were recorded on a Shimadzu X-ray diffractometer, model 6000 at a scanning rate of 10 °C min<sup>-1</sup>. Electron paramagnetic resonance (EPR) spectra were recorded on X-band (ν<sub>mw</sub> = 9.84 GHz) EMXmicro BRUKER spectrometer.

## **Electrochemical measurement in H-type cell**

2 mg final powders and 2 mg commercial Carbon black was dispersed in the mixture containing 1.92 mL ethanol and 80 μL Nafion solution (5 %) under ultrasonic for 30 minutes. 250 μL of dispersed catalyst was deposited on hydrophobic carbon paper (1 cm<sup>2</sup>) as the working electrode with catalyst loading mass of 0.25 mg cm<sup>-2</sup>.

Before electrochemical test, the Nafion 117 membrane was pretreated by sequentially heating in H<sub>2</sub>O<sub>2</sub> solution (5 %) for 1 h, diluted H<sub>2</sub>O for 1 h, 0.5 M H<sub>2</sub>SO<sub>4</sub> solution for 1 h, and diluted H<sub>2</sub>O for 1 h. The N<sub>2</sub> (99.999%) and Ar (99.999%) gas as feeding gas were purified by 100 mM NaOH, 50 mM FeSO<sub>4</sub>, and 50 mM H<sub>2</sub>SO<sub>4</sub> before flowing into the reaction system. The eNRR test was conducted in electrochemical workstation (660E) and a H-type cell separated by pretreated Nafion-

117 membrane using 0.5 M  $\text{Li}_2\text{SO}_4$  solution as electrolyte filled in two compartments. The catalyst loaded on carbon paper, carbon rod, and saturated Ag/AgCl electrode severally served as working electrode, counter electrode, and reference electrode. The applied potentials against saturated Ag/AgCl reference electrode were iR-compensated and converted to the reversible hydrogen electrode (RHE) scale based on the following equation:

$$E_{\text{(RHE)}} = E_{\text{(Ag/AgCl)}} + 0.197 \text{ V} + 0.059 \times \text{pH}.$$

### **Electrochemical measurement in PEM cell**

2 mg final powders and 2 mg commercial Carbon black was dispersed in the mixture containing 1.92 mL ethanol and 80  $\mu\text{L}$  Nafion solution (5 %) under ultrasonic for 30 minutes. 2 mL dispersed catalyst was deposited on hydrophobic carbon paper ( $1 \text{ cm}^2$ ) as the eNRR electrode with catalyst loading mass of  $2 \text{ mg cm}^{-2}$ . 1 mg of commercial PtRu/C was dispersed in the mixture containing 0.96 mL of ethanol and 40  $\mu\text{L}$  of Nafion solution (5 %) under ultrasonic for 30 minutes. 1 mL of the suspension was sprayed onto hydrophobic carbon paper ( $1 \text{ cm}^2$ ) as the HOR electrode with catalyst loading mass of  $1 \text{ mg cm}^{-2}$ . Before electrolysis, the  $\text{N}_2$  flow was purified by NaOH,  $\text{FeSO}_4$  and  $\text{H}_2\text{SO}_4$  solution to eliminate the possible  $\text{NH}_3$  and  $\text{NO}_x$  contaminations. After continuous ventilation for 10 min, CA tests were conducted at specified applied potentials for 10 min, and the outlet gas flow containing  $\text{NH}_3$  production was bubbled into  $\text{H}_2\text{SO}_4$  solution. After electrolysis, ventilation was continued for another 10 min to ensure the  $\text{NH}_3$  production in  $\text{N}_2$  flow was absorbed in  $\text{H}_2\text{SO}_4$  solution.

### **Quantitative detection of $\text{NH}_3$ production in H-type cell**

#### **Indophenol blue method**

For quantitative detection of  $\text{NH}_3$  production in H-type cell after potentiostatic testing for 2 h,

2 mL electrolyte solution was subsequently mixed with 2 mL of 5 wt% salicylic acid solution containing 5 wt% sodium citrate and 1.0 M NaOH, 1 mL of 50 mM NaClO and 0.2 mL of 1 wt% sodium nitroferricyanide. After incubation for 2 h, the spectra with absorbance at 655 nm was measured using a UV-Vis spectrophotometer. According to the absorbance at 655 nm of standard  $(\text{NH}_4)_2\text{SO}_4$  solution at various  $\text{NH}_3$  concentrations in  $\text{Li}_2\text{SO}_4$  solution, a calibration curve of concentration-absorbance (655 nm) was plotted for to accurately determine the  $\text{NH}_3$  concentration.

### **IC method**

To ensure the accuracy of results obtained from indophenol blue method, IC was additionally conducted, with the characteristic peaks of  $\text{NH}_4^+$  centered at 6.1 min in the time-dependent spectra.

According to the area of the peak of standard  $(\text{NH}_4)_2\text{SO}_4$  solution at various  $\text{NH}_3$  concentrations, a linear equation correlating concentration with peak area was plotted for to accurately determine the concentration of  $\text{NH}_3$  production.

### **NMR method**

$^1\text{H}$ -NMR measurements were additionally measured to trace the N-source of  $\text{NH}_3$  production and further determine the concentration. In detail, after electrolysis using purified  $^{14}\text{N}_2$  or  $^{15}\text{N}_2$  (99.999%) gas as feeding gas, 5 mL of the  $\text{H}_2\text{SO}_4$  solution containing  $\text{NH}_3$  production was concentrated to 1 mL with the pH in the range of 1~2. After adding 100  $\mu\text{L}$  of  $\text{D}_2\text{O}$  into 900  $\mu\text{L}$  of obtained solution, the  $\text{NH}_3$  production was quantified, with the  $^1\text{H}$  NMR signal recorded on a Bruker 400 MHz system.

## Quantitative detection of NH<sub>3</sub> production in PEM electrolyzer

The NH<sub>3</sub> generated in PEM electrolyzer was absorbed in H<sub>2</sub>SO<sub>4</sub> solution (pH = 3), and quantitatively determined using the salicylate method. Typically, 2 mL the H<sub>2</sub>SO<sub>4</sub> solution containing NH<sub>3</sub> production was diluted to 8 mL and sequentially mixed with 1 mL of 0.4 M salicylic sodium solution containing 0.32 M NaOH, 100 μL of NaClO solution (ρCl = 4 ~ 4.9) and NaOH (0.75 M), and 100 μL 1 wt% sodium nitroferricyanide for 1 h. The spectra with absorbance at 655 nm was measured using a UV-Vis spectrophotometer, and the concentration-absorbance curve was calibrated using standard (NH<sub>4</sub>)<sub>2</sub>SO<sub>4</sub> solutions for quantification of NH<sub>3</sub> production.

Calculations of NH<sub>3</sub> yield and Faradaic efficiency (FE):

The FEs for NH<sub>3</sub> generation was calculated by the following equation (1):

$$FE = \frac{3F \times C_{NH_3} \times V}{17 \times Q}$$

and rates for NH<sub>3</sub> generation was calculated by the following equation (2):

$$NH_3 \text{ yield rate} = \frac{C_{NH_3} \times V}{m \times t}$$

Where F is Faraday constant (96485 C mol<sup>-1</sup>);  $C_{NH_3}$  is the measured mass concentration of NH<sub>3</sub> in the aqueous solution; V represents the volume of the reaction solution; Q is the quantity of electric charge achieved by integrating the i-t curve; m is the mass of catalyst loaded on the electrode support; t represents the time for potentiostatic testing.

## Detection of N<sub>2</sub>H<sub>4</sub> by-production.

The concentration of N<sub>2</sub>H<sub>4</sub> in electrolyte solution after electrolysis for 2 h was determined by

Watt and Chrisp's method. Typically, 5.99 g of para-(dimethylamino) benzaldehyde was dissolved in 300 mL of ethanol and 30 mL of concentrated HCl solution, which served as chromogenic agent. Then 5 mL of electrolyte solution after electrolysis was added to 5 mL of the above mixture, and incubated for 15 min. The spectra with absorbance at 455 nm was measured using a UV-Vis spectrophotometer, and the concentration-absorbance curve was calibrated using standard hydrazine hydrate solutions with a series of concentration in 0.5 M  $\text{Li}_2\text{SO}_4$  solution for quantification of  $\text{N}_2\text{H}_4$  by-production.

#### **Determination of $\text{NO}_2^-$ contamination.**

The N-(1-naphthyl)-ethylenediamine dihydrochloride spectrophotometric method was employed for determination of  $\text{NO}_2^-$  contamination. Typically, 0.5 g of sulfanilic acid and 5 mg of N-(1-naphthyl)-ethylenediamine dihydrochloride was dissolved in 90 mL of diluted water and 5 mL of acetic acid, followed by adjusting the volume to 100 mL with deionized water. The obtained solution as chromogenic agent was severally mixed with the blank and  $\text{N}_2$ -saturated electrolyte solution with volume ratio of 1:4. After incubation for 30 min, the absorption spectrum at 548 nm was measured using an UV-vis spectrophotometer.

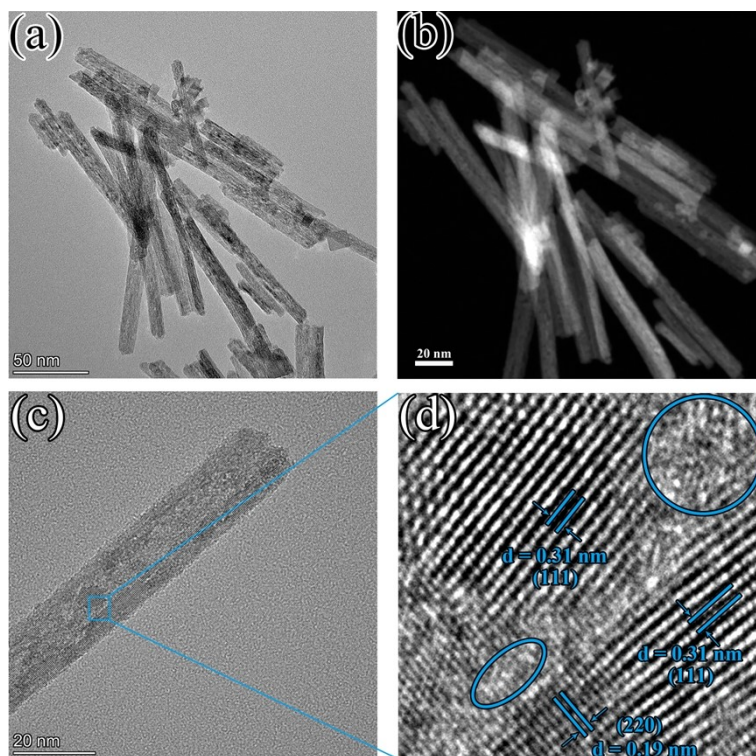

Figure S1. TEM images (a) and (c), HADDF-STEM image (b), and HRTEM (d) of RuAu/CeO<sub>1.76</sub> nanorods.

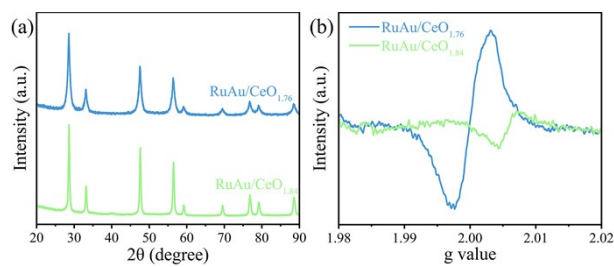

Figure S2. XRD patterns (a) and EPR spectra (b) of RuAu/CeO<sub>1.76</sub> and RuAu/CeO<sub>1.84</sub> nanorods.

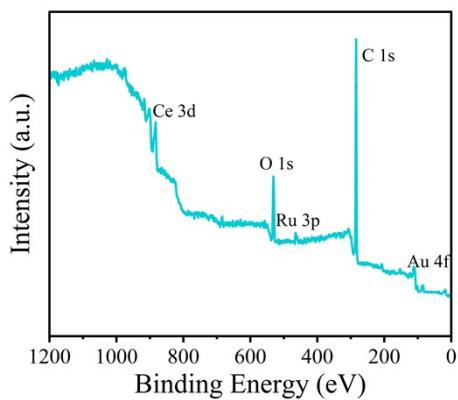

Figure S3. The Survey XPS spectrum of RuAu/CeO<sub>1.76</sub> catalyst displayed Ce and O with the presence of Ru and Au elements.



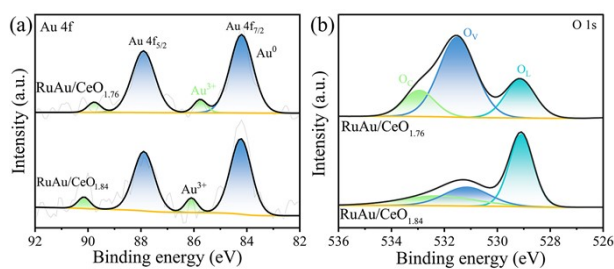

Figure S4. The high-resolution Au 4f (a) and O 1s (b) XPS spectra of RuAu/CeO<sub>1.76</sub> catalyst. Particularly, oxygen vacancies in the metal oxides could bind with the H<sub>2</sub>O molecules, and further decomposed into the OH<sup>-</sup> according to:

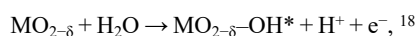

That means the observed peak assigned to OV in the XPS spectra overlaps with the peak assigned to the OH<sup>-</sup>.

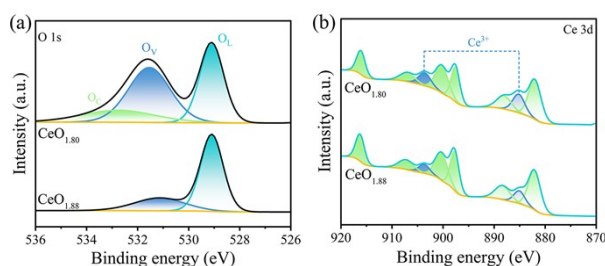

Figure S5. High-resolution O 1s (a) and Ce 3d (b) XPS spectra of pristine CeO<sub>1.80</sub> and CeO<sub>1.88</sub>, respectively. In contrast, the O 1s (Fig. S5a,) and Ce 3d (Fig. S5b,) XPS spectra of pristine CeO<sub>1.80</sub> and CeO<sub>1.88</sub> were also recorded, achieving a limited percent of OVs and Ce<sup>3+</sup> on the pristine supports. That is, the deposition of RuAu species further increased the concentration of surface OVs of the associated CeO<sub>1.88</sub> supports, which originated from the charge transfer from the supports to the RuAu species.

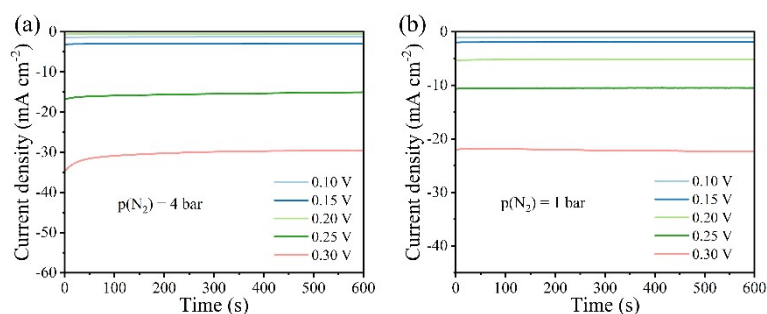

Figure S6. Chronoamperometry curves of RuAu/CeO<sub>1.84</sub> catalyst recorded at various potentials in PEM electrolyzer for 10 min with applied N<sub>2</sub> pressure of 4 bar (a) and 1 bar (b), which displayed the corresponding chronoamperometry

(CA) curves, with a negligible loss in current density.

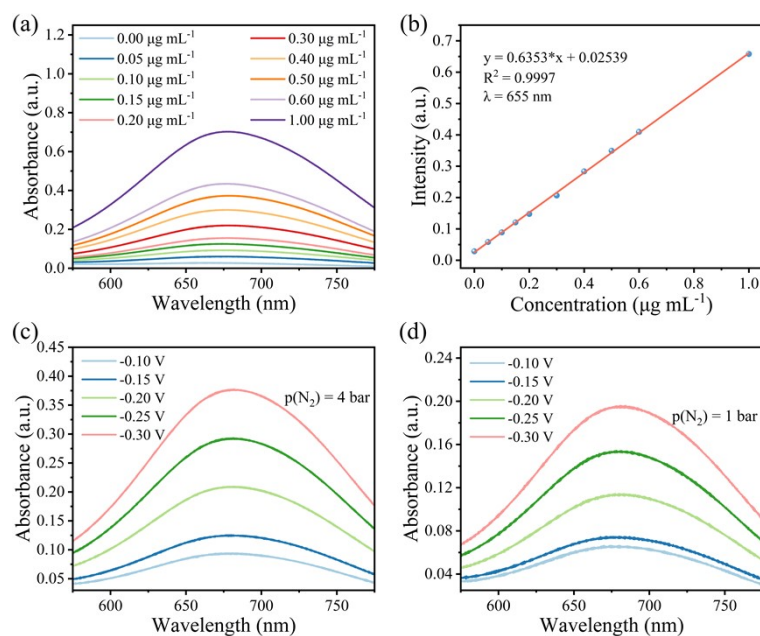

Figure S7. After electrolysis, the  $\text{NH}_3$  production in the gas flow outlet the electrolyzer was absorbed in 30 ml of  $\text{H}_2\text{SO}_4$  solution (pH=3), and then quantified by salicylic acid method combined with ultraviolet-visible spectroscopy.

(a) UV-vis absorption spectra of  $(\text{NH}_4)_2\text{SO}_4$  with different concentrations in  $\text{H}_2\text{SO}_4$  solution (pH = 3). (b) The calibration curve for determination of  $\text{NH}_4^+$  concentration. UV-vis absorption spectra of  $\text{NH}_3$  production in  $\text{H}_2\text{SO}_4$  solution (pH = 3) after eNRR in PEM electrolyzer under various cell voltage with applied  $\text{N}_2$  pressure of 4 bar (c) and 1 bar (d).

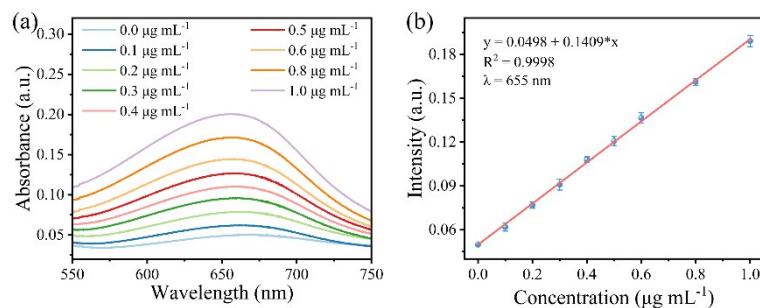

Figure S8. Using Indophenol blue method for quantitative detection of  $\text{NH}_4^+$  after eNRR in 0.5 M  $\text{Li}_2\text{SO}_4$  electrolyte solution. (a) UV-vis absorption spectra of  $(\text{NH}_4)_2\text{SO}_4$  with different concentrations in 0.5 M  $\text{Li}_2\text{SO}_4$  solution. (b)

The calibration curve for determination of  $\text{NH}_4^+$  concentration (error bar = SD,  $n=3$ ).

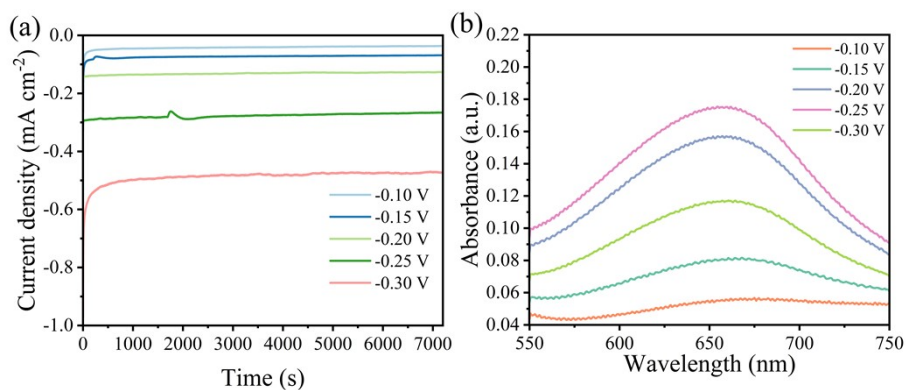

Figure S9. UV-vis absorption spectra of  $\text{NH}_4^+$  production in 0.5 M  $\text{Li}_2\text{SO}_4$  electrolyte after electrolysis for 2h under various applied potentials using  $\text{RuAu/CeO}_{1.76}$  catalyst.

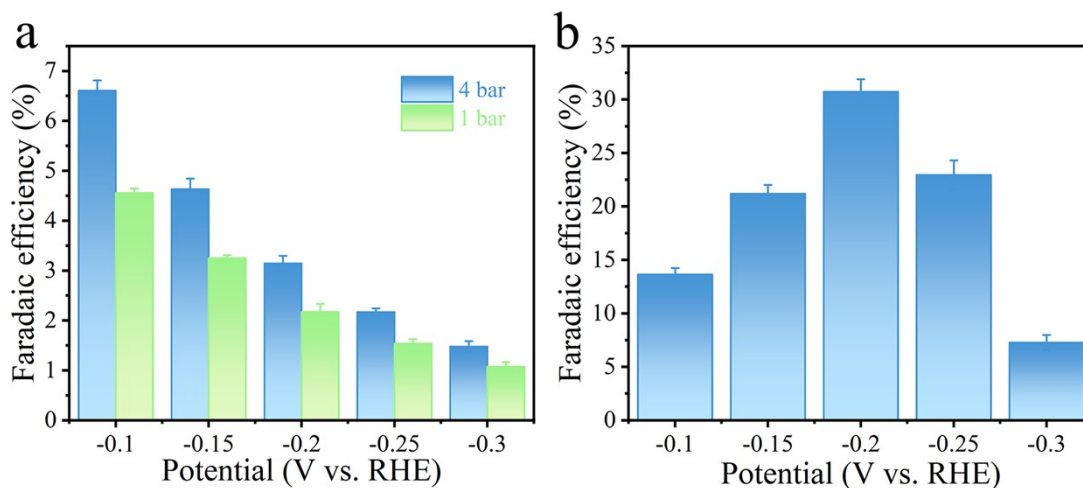

Figure S10. FE for  $\text{NH}_3$  production using  $\text{RuAu/CeO}_{1.76}$  catalyst various applied potentials (a) in PEM electrolyzer with  $\text{N}_2$  pressure of 4 bar and 1 bar, respectively, and (b) in 0.5 M  $\text{Li}_2\text{SO}_4$  electrolyte in H-type cell.

However, the  $\text{RuAu/CeO}_{1.76}$  catalyst displayed lower FEs in the PEM electrolyzer compared to those in the H-type cell, for significantly accelerated  $\text{H}^+$  transfer kinetics in the PEM electrolyzer under higher current density preferentially enhanced the competitive HER process.

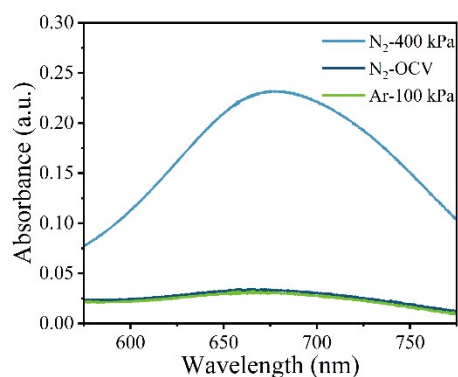

Figure S11. UV-vis absorption spectra of  $\text{NH}_3$  production in  $\text{H}_2\text{SO}_4$  solution after electrolysis in PEM electrolyzer coupled with  $\text{RuAu/CeO}_{1.76}$ -based GDE, with applied  $\text{N}_2$  pressure of 4 bar under  $-0.3$  V vs. RHE and OCV, and applied Ar pressure of 1 bar under  $-0.3$  V vs. RHE, respectively. The interference of  $\text{NH}_3$  contaminants in the  $\text{H}_2\text{SO}_4$  solution and the feeding gas was excluded, further verifying the accuracy of the reaction results in the PEM electrolyzer.

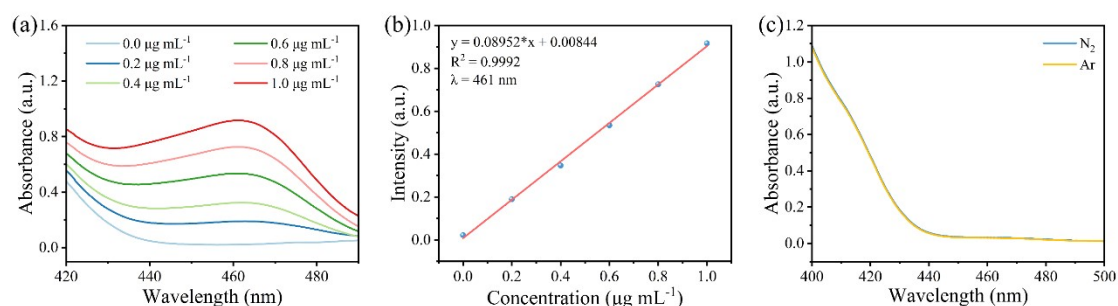

Figure S12. Using Watt and Chrisp's method for quantitative detection of  $\text{N}_2\text{H}_4$  by-products in  $0.5\text{M Li}_2\text{SO}_4$  electrolyte solution. (a) UV-vis absorption spectra of  $\text{N}_2\text{H}_4$  with different concentrations in  $0.5\text{ M Li}_2\text{SO}_4$  solution. (b) The calibration curve for quantitative determination of  $\text{N}_2\text{H}_4$ . (c) UV-vis absorption spectra of  $\text{N}_2\text{H}_4$  in  $\text{N}_2$ - and Ar-saturated electrolyte after electrolysis. No  $\text{N}_2\text{H}_4$  by-product was detected via Watt and Chrisp's method (Fig. S12), illustrating the high selectivity for electrochemical  $\text{N}_2$ -to- $\text{NH}_3$  conversion.

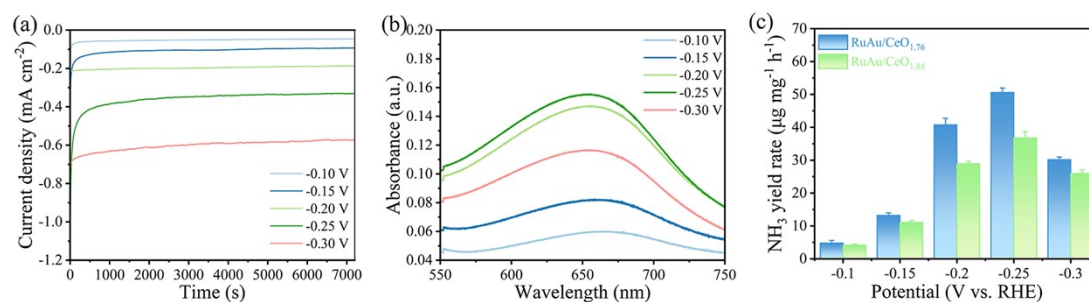

Figure S13. (a) Chronoamperometry curves of RuAu/CeO<sub>1.84</sub> catalyst recorded at various potentials in N<sub>2</sub>-bubbled 0.5 M Li<sub>2</sub>SO<sub>4</sub> solution for 2 h. (b) Corresponding UV-vis absorption spectra of NH<sub>4</sub><sup>+</sup> production using RuAu/CeO<sub>1.84</sub> catalyst. (c) NH<sub>3</sub> generation rates of RuAu/CeO<sub>1.76</sub> and RuAu/CeO<sub>1.84</sub> at each given potential (error bar = SD, n=3).

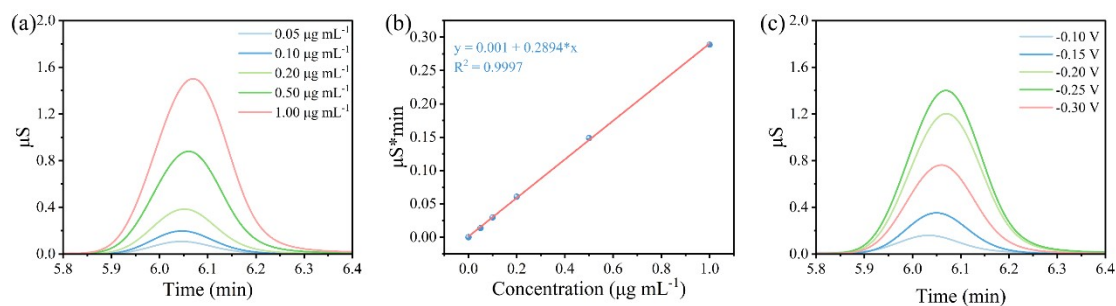

Figure S14. Using IC for detection and quantification of NH<sub>4</sub><sup>+</sup> products after eNRR. (a) IC curves of standard NH<sub>4</sub><sup>+</sup> solution with different concentrations in 0.5 M Li<sub>2</sub>SO<sub>4</sub> solution. (b) The calibration curve for quantitative determination of NH<sub>4</sub><sup>+</sup>. (c) IC curves of NH<sub>3</sub> production in electrolyte after electrolysis for 2h under various applied potentials using RuAu/CeO<sub>1.76</sub> catalyst.

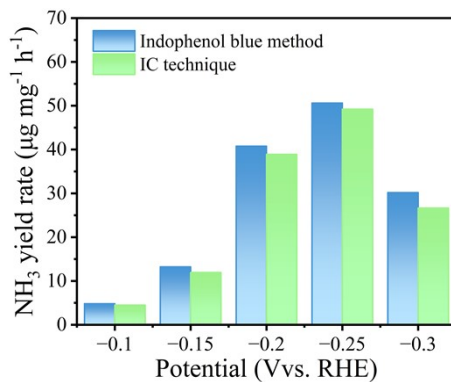

Figure S15. NH<sub>3</sub> production rates over RuAu/CeO<sub>1.76</sub> determined by IC technique and indophenol blue method. The NH<sub>3</sub> yield rates determined by ion chromatography (IC) fitted well with the results from the indophenol blue technique (Fig. S14 and S15), ensuring the accuracy of the eNRR performance.

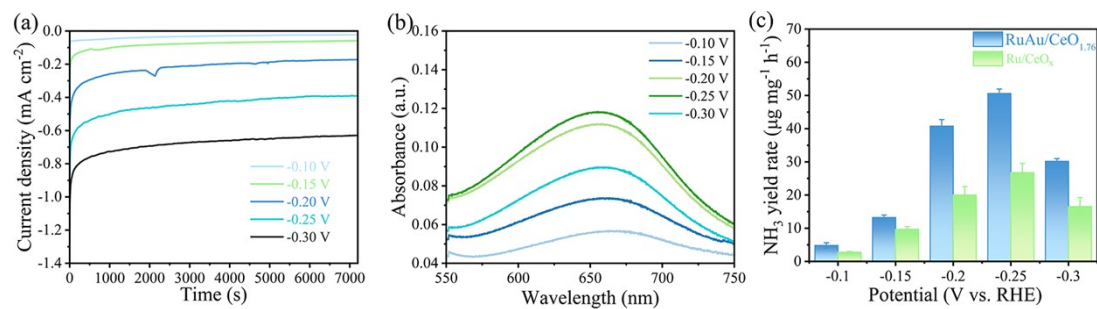

Figure S16. eNRR behavior of Ru/CeO<sub>1.76</sub> catalyst. (a) Chronoamperometry curves of Ru/CeO<sub>2</sub>-VO catalyst recorded at various potentials in N<sub>2</sub>-bubbled 0.5 M Li<sub>2</sub>SO<sub>4</sub> solution for 2 h. (b) Corresponding UV-vis absorption spectra of NH<sub>3</sub> production using Ru/CeO<sub>1.76</sub> catalyst. FEs (c) and rates (d) for NH<sub>3</sub> generation of RuAu/CeO<sub>1.76</sub> and Ru/CeO<sub>1.76</sub> at each given potential (error bar = SD, n=3).

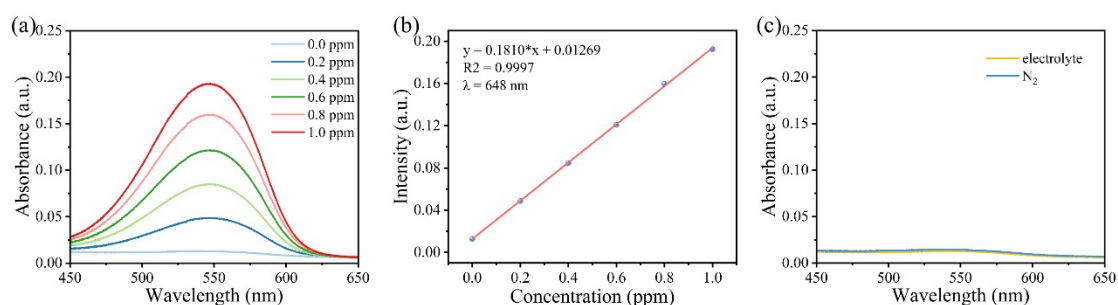

Figure S17. Using indophenol blue method for quantitative detection of NO<sub>2</sub><sup>-</sup> contaminates in 0.5 M Li<sub>2</sub>SO<sub>4</sub> electrolyte solution. (a) UV-vis absorption spectra of NaNO<sub>2</sub> with different concentrations in 0.5 M Li<sub>2</sub>SO<sub>4</sub> solution. (b) The calibration curve for quantitative determination of NO<sub>2</sub><sup>-</sup> contaminates. (c) UV-vis absorption spectra of NO<sub>2</sub><sup>-</sup> in blank electrolyte and N<sub>2</sub>-saturated electrolyte.

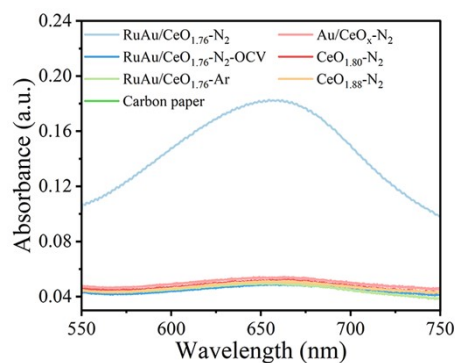

Figure S18. UV-vis absorption spectra of  $\text{NH}_4^+$  production in  $\text{N}_2$ -saturated 0.5 M  $\text{Li}_2\text{SO}_4$  electrolyte after electrolysis at -0.25 V vs. RHE and OCV, and Ar-saturated electrolyte after electrolysis at -0.25 V using RuAu/ $\text{CeO}_{1.76}$ , and  $\text{N}_2$ -saturated electrolyte after electrolysis at -0.25 V vs. RHE using Au/ $\text{CeO}_x$ ,  $\text{CeO}_{1.80}$ ,  $\text{CeO}_{1.88}$  and pristine carbon paper as electrodes, respectively. We additionally eliminated the influence of  $\text{NO}_x$  pollutants in the primary electrolyte, and excluded the possible false positives from the N-containing pollution.

Table S1. The mass loading of Ru and Au in RuAu/ $\text{CeO}_{1.76}$  and RuAu/ $\text{CeO}_{1.84}$ , respectively.

|    | RuAu/ $\text{CeO}_{1.76}$ | RuAu/ $\text{CeO}_{1.84}$ |
|----|---------------------------|---------------------------|
| Ru | 1.652 %                   | 1.636 %                   |
| Au | 3.187 %                   | 3.143 %                   |

Table S2. Peak area percentage recorded from the XPS spectra.

| Sample                    | Peak area percentage (%) |               |                  |              |
|---------------------------|--------------------------|---------------|------------------|--------------|
|                           | $\text{Ru}^0$            | $\text{Au}^0$ | $\text{Ce}^{3+}$ | $\text{O}_v$ |
| RuAu/ $\text{CeO}_{1.76}$ | 72.23                    | 98.31         | 24.47            | 59.77        |

|                          |       |       |       |       |
|--------------------------|-------|-------|-------|-------|
| RuAu/CeO <sub>1.84</sub> | 63.76 | 92.24 | 15.68 | 25.50 |
| CeO <sub>1.80</sub>      |       |       | 19.86 | 45.43 |
| CeO <sub>1.88</sub>      |       |       | 11.84 | 18.79 |

Table S3 Comparison of ENRR activity between RuAu/CeO<sub>1.76</sub> and other reported catalysts

| Catalyst                                 | Potential/voltage | Rates                                      | Electrolyzer     | Reference |
|------------------------------------------|-------------------|--------------------------------------------|------------------|-----------|
| RuAu/CeO <sub>1.76</sub>                 | -0.3 V vs. RHE    | 30.17 $\mu\text{g mg}^{-1} \text{h}^{-1}$  | H-type cell      | This work |
|                                          | -0.3 V            | 185.53 $\mu\text{g mg}^{-1} \text{h}^{-1}$ | PEM electrolyzer |           |
| Mn-N <sub>4</sub> /PC                    | -0.35 V vs. RHE   | 66.41 $\mu\text{g mg}^{-1} \text{h}^{-1}$  | H-type cell      | 1         |
| s-TiO <sub>2</sub> NTs                   | -0.6 V vs. RHE    | 16.67 $\mu\text{g mg}^{-1} \text{h}^{-1}$  | H-type cell      | 2         |
| PdCu/NC                                  | -0.45 V vs. RHE   | 69.2 $\mu\text{g mg}^{-1} \text{h}^{-1}$   | H-type cell      | 3         |
| MXene/TiFeOx-700                         | -0.2 V vs. RHE    | 21.9 $\mu\text{g mg}^{-1} \text{h}^{-1}$   | H-type cell      | 4         |
| np-B                                     | -0.4 V vs. RHE    | 23.11 $\mu\text{g mg}^{-1} \text{h}^{-1}$  | H-type cell      | 5         |
| FePcTa-PPy                               | -0.2 V vs. RHE    | 31.47 $\mu\text{g mg}^{-1} \text{h}^{-1}$  | H-type cell      | 6         |
| Au-Fe <sub>3</sub> O <sub>4</sub>        | -0.20 V vs. RHE   | 21.42 $\mu\text{g mg}^{-1} \text{h}^{-1}$  | H-type cell      | 7         |
| NiTe-800                                 | -0.10 V vs. RHE   | 33.34 $\mu\text{g mg}^{-1} \text{h}^{-1}$  | H-type cell      | 8         |
| Fe1Sx@TiO <sub>2</sub>                   | -0.20 V vs. RHE   | 18.3 $\mu\text{g mg}^{-1} \text{h}^{-1}$   | H-type cell      | 9         |
| Cu-TiO <sub>2</sub>                      | -0.55 V vs. RHE   | 21.31 $\mu\text{g mg}^{-1} \text{h}^{-1}$  | H-type cell      | 10        |
| Pd <sub>0.2</sub> Cu <sub>0.8</sub> /rGO | -0.2 V vs. RHE    | 2.8 $\mu\text{g mg}^{-1} \text{h}^{-1}$    | H-type cell      | 11        |
| SA Ru-Mo <sub>2</sub> CTX                | -0.3 V vs. RHE    | 40.57 $\mu\text{g mg}^{-1} \text{h}^{-1}$  | H-type cell      | 12        |
| FeOOH QDs-GS                             | -0.4 V vs. RHE    | 27.3 $\mu\text{g mg}^{-1} \text{h}^{-1}$   | H-type cell      | 13        |



|                               |                |                                           |              |    |
|-------------------------------|----------------|-------------------------------------------|--------------|----|
| Mo(IV)-Doped FeS <sub>2</sub> | -0. V vs. RHE  | 25.15 $\mu\text{g mg}^{-1} \text{h}^{-1}$ | H-type cell  | 14 |
| Cu-coated GDE                 | -0.5 V vs. RHE | 2.14 $\text{nmol cm}^{-2} \text{s}^{-1}$  | Flow reactor | 15 |
| SACs-MoS <sub>2</sub> -Fe     | -0.2 V vs. RHE | 36.1 $\text{mmol g}^{-1} \text{h}^{-1}$   | Flow reactor | 16 |
| Ru/CB                         | -0.1 V vs. RHE | 0.99 $\text{nmol cm}^{-2} \text{s}^{-1}$  | Flow reactor | 17 |

## Reference

1. L. Han, M. Hou, P. Ou, H. Cheng, Z. Ren, Z. Liang, J. A. Boscoboinik, A. Hunt, I. Waluyo, S. Zhang, L. Zhuo, J. Song, X. Liu, J. Luo, and H. Xin, *ACS Catalysis*, 2020, 11, 509-516.
2. P. Li, Z. Jin, Z. Fang and G. Yu, *Angew. Chem. Int. Ed. Engl.*, 2020, **59**, 22610-22616.
3. L. Han, Z. Ren, P. Ou, H. Cheng, N. Rui, L. Lin, X. Liu, L. Zhuo, J. Song, J. Sun, J. Luo and H. L. Xin, *Angew. Chem. Int. Ed. Engl.*, 2020, **60**, 345-350.
4. Y. Guo, T. Wang, Q. Yang, X. Li, H. Li, Y. Wang, T. Jiao, Z. Huang, B. Dong, W. Zhang, J. Fan and C. Zhi, *ACS Nano*, 2020, **14**, 9089-9097.
5. J. Lan, M. Peng, P. Liu, D. Chen, X. Xu, M. Luo, Y. Tan and M. Chen, *Mater. Today*, 2020, **38**, 58-66.
6. W. Qiu, N. Yang, D. Luo, J. Wang, L. Zheng, Y. Zhu, E. M. Akinoglu, Q. Huang, L. Shui, R. Wang, G. Zhou, X. Wang and Z. Chen, *Appl. Catal. B: Environ.*, 2021, **293**, 120216.
7. J. Zhang, Y. Ji, P. Wang, Q. Shao, Y. Li and X. Huang, *Adv. Funct. Mater.*, 2019, **30**, 1906579.
8. J. Wang, B. Huang, Y. Ji, M. Sun, T. Wu, R. Yin, X. Zhu, Y. Li, Q. Shao and X. Huang, *Adv. Mater.*, 2020, **32**, e1907112.
9. J. Chen, Y. Kang, W. Zhang, Z. Zhang, Y. Chen, Y. Yang, L. Duan, Y. Li and W. Li, *Angew. Chem. Int. Ed. Engl.*, 2022, e202203022.

10. T. Wu, H. Zhao, X. Zhu, Z. Xing, Q. Liu, T. Liu, S. Gao, S. Lu, G. Chen, A. M. Asiri, Y. Zhang and X. Sun, *Adv. Mater.*, 2020, **32**, e2000299.
11. M.-M. Shi, D. Bao, S.-J. Li, B.-R. Wulan, J.-M. Yan and Q. Jiang, *Adv. Energy Mater.*, 2018, **8**, 1800124.
12. W. Peng, M. Luo, X. Xu, K. Jiang, M. Peng, D. Chen, T. S. Chan and Y. Tan, *Adv. Energy Mater.*, 2020, **10**, 2001364.
13. X. Zhu, J. Zhao, L. Ji, T. Wu, T. Wang, S. Gao, A. A. Alshehri, K. A. Alzahrani, Y. Luo, Y. Xiang, B. Zheng and X. Sun, *Nano Res.*, 2019, **13**, 209-214.
14. H.-B. Wang, J.-Q. Wang, R. Zhang, C.-Q. Cheng, K.-W. Qiu, Y.-J. Yang, J. Mao, H. Liu, M. Du, C.-K. Dong and X.-W. Du, *ACS Catal.*, 2020, **10**, 4914-4921.
15. N. C. Kani, A. Prajapati, B. A. Collins, J. D. Goodpaster and M. R. Singh, *ACS Catal.*, 2020, **10**, 14592-14603.
16. J. Li, S. Chen, F. Quan, G. Zhan, F. Jia, Z. Ai and L. Zhang, *Chem*, 2020, **6**, 885-901.
17. X. Wei, M. Pu, Y. Jin and M. Wessling, *ACS Appl. Mater. Inter.*, 2021, **13**, 21411-21425.
18. S. Hao, M. Liu, J. Pan, X. Liu, X. Tan, N. Xu, Y. He, L. Lei, X. Zhang, *Nat. Commun.*, 2020, **11**, 5368.
